# Supplementary material for: On-line monitoring of organic matter concentrations and character in drinking water treatment systems using fluorescence spectroscopy
Source: Royal Society of Chemistry journal article supplement (doi:10.1039/c6ew00048g), 2016-01-01
Supplement: c6ew00048g1.pdf [file c6ew00048g1.pdf]

## On-line monitoring of organic matter concentrations and character in drinking water treatment systems using fluorescence spectroscopy

Y. Shutova,<sup>a,d</sup> A. Baker,<sup>b</sup> J. Bridgeman<sup>c</sup> and R.K. Henderson<sup>d,†</sup>

---

<sup>a</sup> *UNSW Water Research Centre, UNSW, Sydney, NSW, 2052, Australia*

<sup>b</sup> *Connected Waters Initiative Research Centre, UNSW, Sydney, NSW, 2052, Australia*

<sup>c</sup> *School of Civil Engineering, University of Birmingham, Birmingham, United Kingdom*

<sup>d</sup> *bioMASS lab, School of Chemical Engineering, UNSW, Sydney, NSW, 2052, Australia*

† E-mail: r.henderson@unsw.edu.au

### Supporting information

**Table S1** Concentration and character of organic matter in raw and treated water samples as determined via a one year sampling study by Shutova et al.<sup>1</sup> Fluorescence component data based on the site specific Model B for Capalaba Water Treatment Plant (WTP) and Model G for Yarra Glen WTP (RU = Raman Units).

|                                                     | Capalaba WTP |      |               |      | Yarra Glen WTP |      |               |      |
|-----------------------------------------------------|--------------|------|---------------|------|----------------|------|---------------|------|
|                                                     | Raw water    |      | Treated water |      | Raw water      |      | Treated water |      |
|                                                     | Mean         | SD   | Mean          | SD   | Mean           | SD   | Mean          | SD   |
| DOC<br>(mgC/L)                                      | 12.1         | 1.4  | 5.8           | 1.2  | 3.0            | 0.5  | 1.6           | 0.8  |
| UV <sub>254</sub> (/cm)                             | 0.62         | 0.08 | 0.09          | 0.01 | 0.11           | 0.02 | 0.03          | 0.03 |
| SUVA<br>(m <sup>-1</sup> Lmg <sup>-1</sup> )        | 5.1          | 0.4  | 1.7           | 0.3  | 3.8            | 0.9  | 2.1           | 0.9  |
| C1 (RU)                                             | 2.82         | 0.54 | 0.63          | 0.13 | 0.36           | 0.07 | 0.11          | 0.12 |
| C2 (RU)                                             | 1.81         | 0.20 | 0.72          | 0.16 | 0.37           | 0.06 | 0.19          | 0.17 |
| C3 (RU)                                             | 1.23         | 0.63 | 0.23          | 0.17 |                |      |               |      |
| C4 (RU)                                             |              |      |               |      | 0.11           | 0.04 | 0.07          | 0.03 |
| C5 (RU)                                             |              |      |               |      | 0.11           | 0.03 | 0.05          | 0.01 |
| C6 (RU)                                             |              |      |               |      | 0.09           | 0.03 | 0.07          | 0.02 |
| Sum<br>fluorescence<br>components<br>intensity (RU) | 23.7         | 3.2  | 9.1           | 2.0  | 8.0            | 1.7  | 4.2           | 2.1  |

<sup>1</sup> Y. Shutova, A. Baker, J. Bridgeman and R. K. Henderson, *Water Research*, 2014, **54**, 159-169.

**Table S2** Summary of the optical properties of the various fluorescence probes

| Name of probe/ data logger                               | Supplier       | Excitation | Emission   | Corresponding monitoring point                         |
|----------------------------------------------------------|----------------|------------|------------|--------------------------------------------------------|
| EXO C:<br>fDOM (CDOM) probe/<br>EXO sonde                | YSI            | 365±5 nm   | 480±40 nm  | P1<br>$\lambda_{ex}/\lambda_{em} = 380/488 \text{ nm}$ |
| Cyclops C:<br>CDOM/FDOM probe/<br>Cyclops 7 data logger  | Turner Designs | 368±17 nm  | 470±30 nm  | P1<br>$\lambda_{ex}/\lambda_{em} = 380/488 \text{ nm}$ |
| Cyclops T:<br>Tryptophan probe/<br>Cyclops 7 data logger | Turner Designs | 285 nm     | 350±27.5nm | P4<br>$\lambda_{ex}/\lambda_{em} = 280/328 \text{ nm}$ |

**Table S3** Summary of temperature, turbidity, pH and conductivity observed in Capalaba Water Treatment Plant

|                                  |             | Temperature (°C) |               | Turbidity (FNU) |               | pH        |               | Conductivity (µS/cm) |               |
|----------------------------------|-------------|------------------|---------------|-----------------|---------------|-----------|---------------|----------------------|---------------|
|                                  |             | Raw water        | Treated water | Raw water       | Treated water | Raw water | Treated water | Raw water            | Treated water |
| Mean                             |             | 24.23            | 22.93         | 4.11            | 1.01          |           |               | 206.52               | 254.47        |
| 95% Confidence Interval for Mean | Lower Bound | 24.15            | 22.90         | 4.09            | 0.97          | 6.85      | 5.55          | 206.11               | 254.33        |
|                                  | Upper Bound | 24.31            | 22.96         | 4.13            | 1.05          | 6.86      | 5.57          | 206.92               | 254.60        |
| 5% Trimmed Mean                  |             | 24.33            | 22.94         | 4.10            | 0.93          | 6.86      | 5.57          | 206.85               | 254.47        |
| Median                           |             | 24.52            | 22.93         | 4.00            | 0.80          | 6.87      | 5.59          | 208.00               | 255.00        |
| Variance                         |             | 1.95             | 0.35          | 0.12            | 0.43          | 0.01      | 0.02          | 50.33                | 5.47          |
| Std. Deviation                   |             | 1.40             | 0.59          | 0.34            | 0.65          | 0.09      | 0.14          | 7.09                 | 2.34          |
| Minimum                          |             | 17.76            | 21.16         | 3.50            | 0.30          | 6.47      | 4.73          | 178.00               | 249.00        |
| Maximum                          |             | 27.02            | 24.07         | 5.90            | 10.20         | 7.11      | 5.90          | 239.00               | 260.00        |

**Table S4** Summary of temperature, turbidity, pH and conductivity observed in Yarra Glen WTP

|                                  |             | Temperature (°C) |               | Turbidity (FNU) |               | pH        |               | Conductivity (µS/cm) |               |
|----------------------------------|-------------|------------------|---------------|-----------------|---------------|-----------|---------------|----------------------|---------------|
|                                  |             | Raw water        | Treated water | Raw water       | Treated water | Raw water | Treated water | Raw water            | Treated water |
| Mean                             |             | 20.11            | 20.74         | 5.18            | 1.19          |           |               | 184.91               | 249.36        |
| 95% Confidence Interval for Mean | Lower Bound | 20.00            | 20.71         | 5.16            | 1.16          | 6.79      | 5.58          | 184.48               | 249.22        |
|                                  | Upper Bound | 20.22            | 20.77         | 5.21            | 1.21          | 6.81      | 5.59          | 185.34               | 249.50        |
| 5% Trimmed Mean                  |             | 20.01            | 20.76         | 5.17            | 1.15          | 6.80      | 5.59          | 184.47               | 249.33        |
| Median                           |             | 19.63            | 20.93         | 5.10            | 1.10          | 6.80      | 5.62          | 183.00               | 249.00        |
| Variance                         |             | 4.56             | 0.39          | 0.20            | 0.21          | 0.02      | 0.01          | 69.75                | 6.78          |
| Std. Deviation                   |             | 2.14             | 0.63          | 0.45            | 0.46          | 0.14      | 0.11          | 8.35                 | 2.60          |
| Minimum                          |             | 16.38            | 19.23         | 4.50            | 0.50          | 6.40      | 5.03          | 173.00               | 243.00        |
| Maximum                          |             | 25.80            | 21.94         | 11.00           | 4.4           | 7.12      | 5.84          | 209.00               | 259.00        |

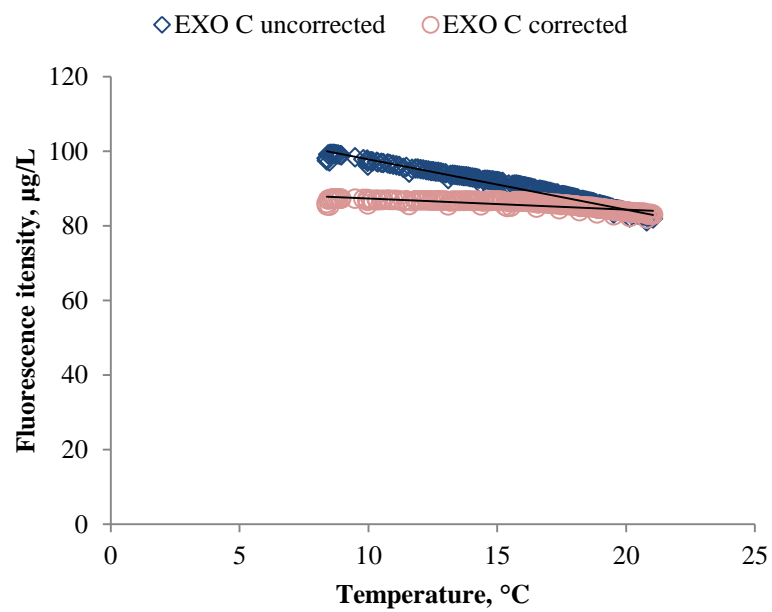

**Fig. S1** Example of the correlation between water temperature and uncorrected and corrected fluorescence intensity measured by EXO C probe in Capalaba raw water

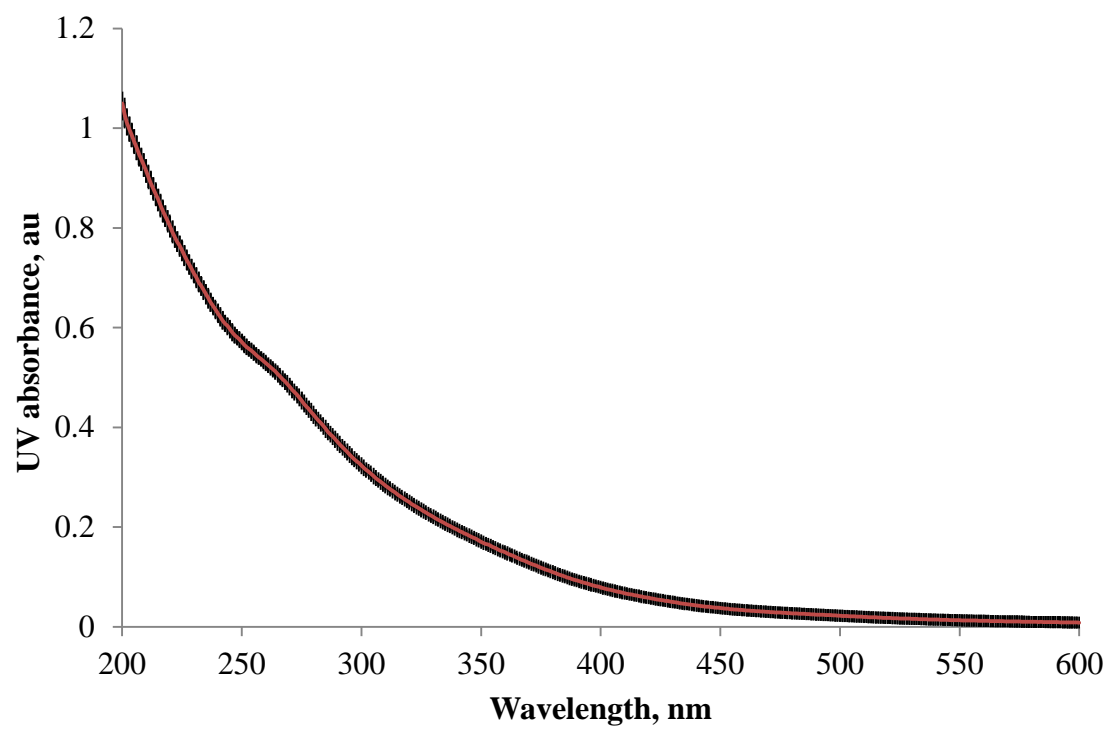

**Fig. S2** Average Capalaba WTP raw water sample UV absorbance signal (red line). Vertical lines represent the standard deviation of the UV absorbance during the on-line monitoring study based on the grab samples.

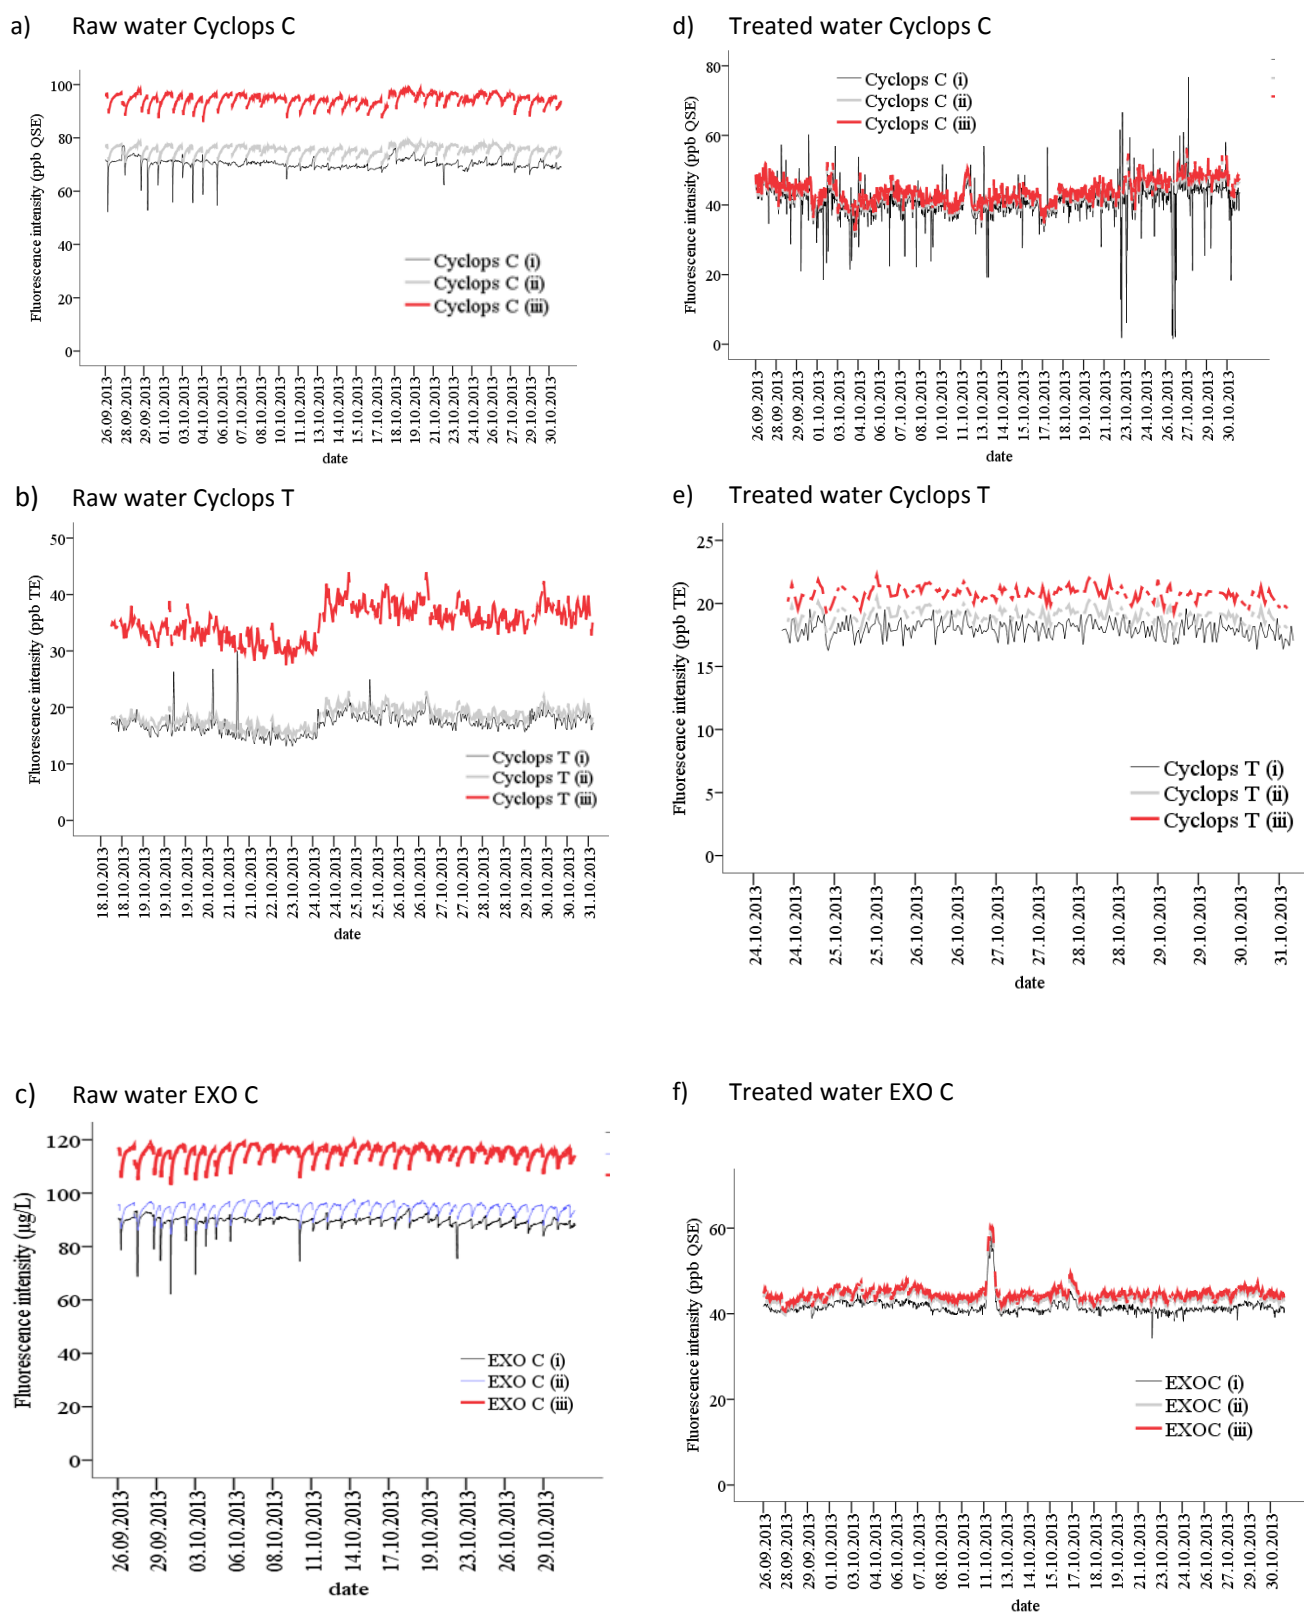

**Fig. S3** Capalaba Water Treatment Plant raw water signal correction where (i) original signal, (ii) temperature corrected signal and (iii) temperature and IFE corrected signal, outliers removed for a) raw water Cyclops C, b) raw water Cyclops T, c) raw water EXO C, d) treated water Cyclops C, e) treated water Cyclops T and f) treated water EXO C.



a) Raw water Cyclops C

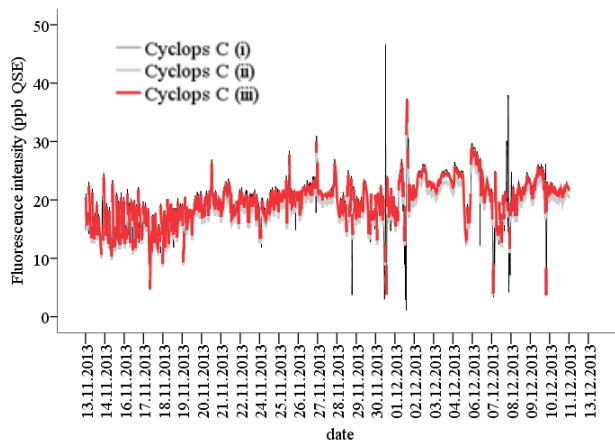

d) Treated water Cyclops C

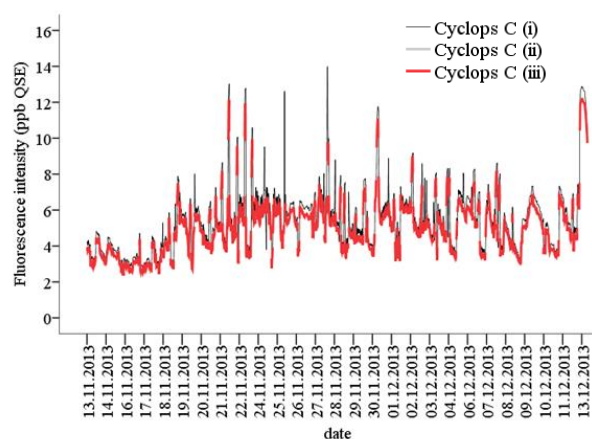

b) Raw water Cyclops T

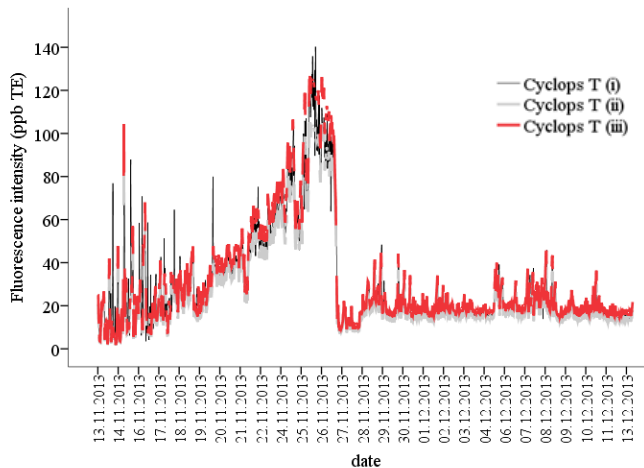

e) Treated water Cyclops T

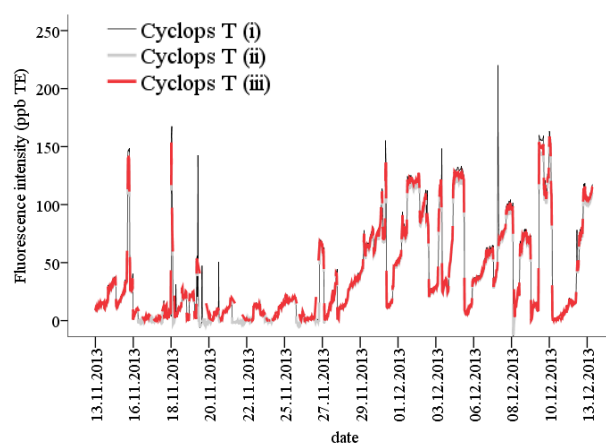

c) Raw water EXO C

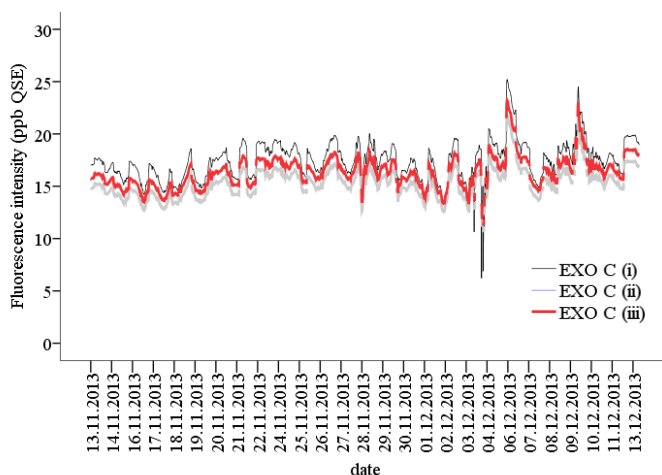

**Fig. S4** Yarra Glen Water Treatment Plant (WTP) treated water signal correction. (i) is original signal, (ii) temperature corrected signal and (iii) temperature and IFE corrected signal, outliers removed for a) raw water Cyclops C, b) raw water Cyclops T, c) raw water EXO C, d) treated water Cyclops C and e) treated water Cyclops T. Note that the EXO C was not sufficiently sensitive to analyse Yarra Valley WTP treated water.

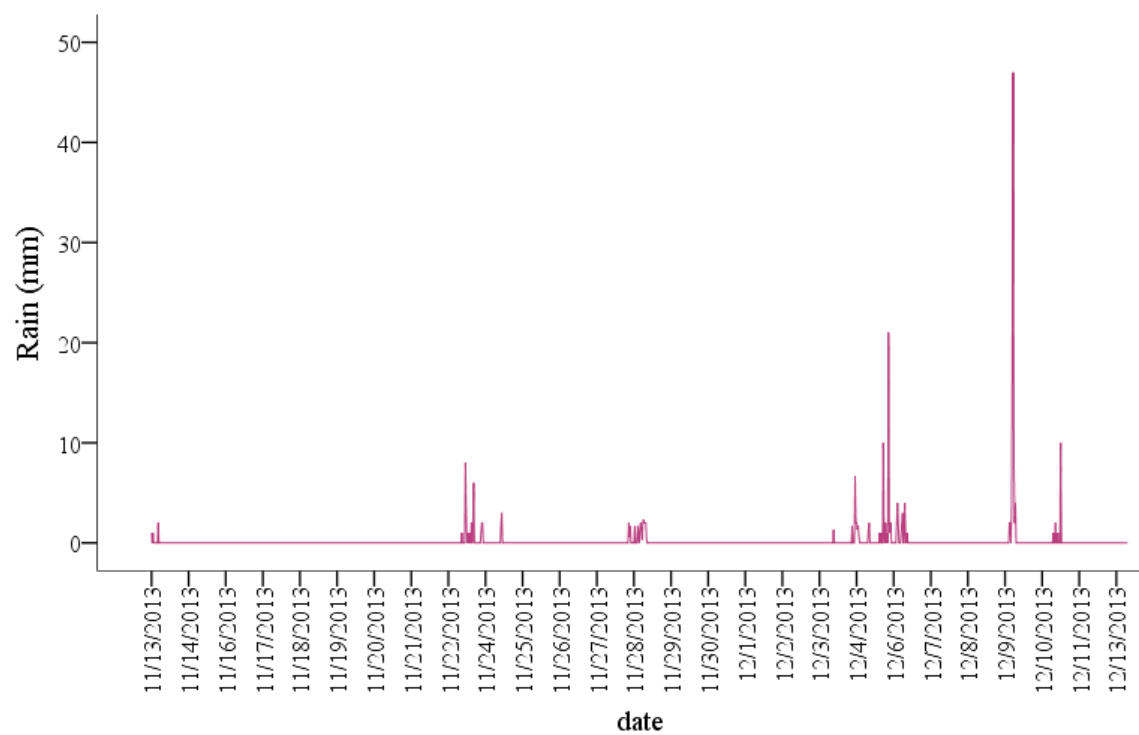

**Fig. S5** Rain events during the on-line monitoring study at Yarra Glen WTP
